# Supplementary material for: Chemical composition, optical properties, and oxidative potential of water- and methanol-soluble organic compounds emitted from the combustion of biomass materials and coal
Source: Copernicus journal article supplement (doi:10.5194/acp-2021-159), 2021-02-23
Supplement: Supplementary file [file acp-2021-159-supplement.pdf]

1 Supporting information

2

3 **Chemical composition, optical properties, and oxidative potential of water- and**  
4 **methanol-soluble organic compounds emitted from the combustion of biomass materials**  
5 **and coal**

6

7 Tao Cao<sup>1,2</sup>, Meiju Li<sup>1,3</sup>, Chunlin Zou<sup>1,3</sup>, Xingjun Fan<sup>4</sup>, Jianzhong Song<sup>1,2,5,\*</sup>, Wanglu, Jia<sup>1,2</sup>,  
8 Chiling Yu<sup>1,2</sup>, Zhiqiang Yu<sup>1,2</sup>, Ping'an Peng<sup>1,2,3,5</sup>

9

10 <sup>1</sup>State Key Laboratory of Organic Geochemistry and Guangdong Provincial Key Laboratory  
11 of Environmental Protection and Resources Utilization, Guangzhou Institute of Geochemistry,  
12 Chinese Academy of Sciences, Guangzhou 510640, China

13 <sup>2</sup>CAS Center for Excellence in Deep Earth Science, Guangzhou, 510640, China

14 <sup>3</sup>University of Chinese Academy of Sciences, Beijing 100049, China

15 <sup>4</sup>College of Resource and Environment, Anhui Science and Technology University, Anhui  
16 233100, China

17 <sup>5</sup>Guangdong-Hong Kong-Macao Joint Laboratory for Environmental Pollution and Control

18

19 \*Correspondence to: Jianzhong Song (songjzh@gig.ac.cn)

20

21

22 **CONTENTS:**

- 23 1. Biomass and coal samples
- 24 2. Collection of smoke samples from BB and CC
- 25 3. Extraction and fractionation of BrC
- 26 4. Organic carbon/elemental carbon (OC/EC) and total organic carbon (TOC) analysis
- 27 5. UV-visible properties
- 28 6. Table S1. Region, excitation/emission wavelength maxima range and attribution of  
29 chromophores in BrC emitted from BB and CC
- 30 7. Table S2. Results of DTT assay conducted on the WSOC, HULIS and MSOC of smoke  
31 samples
- 32 8. Figure S1. The normalized UV-vis spectra by organic carbon contents of WSOC, HULIS,  
33 and MSOC fractions
- 34 9. Figure S2. EEM fluorescence counter maps of corresponding WSOC, HULIS, MSOC of  
35 BB and CC smoke samples, presented as specific intensity (a.u. L(mg C<sup>-1</sup>))
- 36 10. Figure S3. <sup>1</sup>H-NMR stacking diagram of corresponding WSOC, HULIS, MSOC of BB  
37 and CC smoke samples. The segment from 4.40 to 5.60 ppm was removed for NMR  
38 spectra due to MeOH and H<sub>2</sub>O residues. The peaks were assigned to specific compounds  
39 as follows: Levoglucosan (L), Phthalic acid (PA)

40

41

42

43

## 44 **S1. Biomass and coal samples**

45 In this study, six biomass materials and five types of coal were collected and burned to  
46 investigate the optical and chemical properties of the brown carbon (BrC) fractions emitted  
47 from biomass burning (BB) and coal combustion (CC) smoke. The six biomass materials  
48 consisted of three types of crop straw (wheat straw [WS], rice straw [RS], and corn straw  
49 [CS]) and three types of wood (pine wood [PW], Chinese fir [CF], and white poplar [WP]).  
50 The three crop straws were chosen because they were the main types of crop straw burned in  
51 China. These crop straws are usually used as fuels for heating in the winter or cooking in  
52 rural areas throughout the year, and are also occasionally burned in agricultural fields after  
53 the harvest season (Ke et al., 2019). The three wood materials are widespread in forests and  
54 are commonly used as biomass fuels in some rural areas of China. The combustion of these  
55 crop straws and woods has been reported to make a significant contribution to the  
56 atmospheric aerosol in China (Fan et al., 2018; Shen et al., 2013). Therefore, these biomass  
57 materials were selected as representative biomass fuels for the study of BB-derived BrC. In  
58 this study, WS, RS, and CS were collected in the rural area of Bengbu, Anhui Province,  
59 China, while PW, CF, and WP were collected from a forest area in Lu'an, Anhui Province,  
60 China. Before the experiment, the crop straws and wood materials were washed with water  
61 and air dried for seven days.

62 In some developing countries, such as China, coal is still an important fuel in rural areas  
63 and also makes a large contribution to the levels of atmospheric pollution. In this study, five  
64 coals were chosen for the investigation of their BrC fractions from CC. They consisted of four  
65 bituminous coals (B-1, B-2, B-3, and B-4, with volatile fractions of 34%, 32%, 25%, and 19%,

66 respectively) and one anthracitic coal (with a volatile fraction of 3.3%). These five coals  
67 represented the major types of coal used for residential CC in China. After collection, the coals  
68 were washed with water three times to remove dust and then air-dried. Then raw coal was  
69 crushed, fully mixed, and made into coal briquettes.

70

## 71 **S2. Collection of smoke samples from BB and CC**

72 Samples of the smoke emitted from BB and CC were collected in a combustion and  
73 sampling system that was introduced in our previous studies (Fan et al., 2018; Li et al., 2018).  
74 The instrument was made of stainless steel and consisted of a combustion hood, clean air  
75 dilution and injection ports, smoke pipe, mixing fan, mixing chamber, PM<sub>2.5</sub> sampler  
76 (JCH-120F Intelligent medium flow PM sampler, Juchuang Environmental Protection Group  
77 Co., Ltd, Qindao, China), and exhaust port. The smoke samples emitted from BB and CC  
78 were then collected as follows:

79 (1) Biomass burning smoke samples. The biomass fuels were first prepared as small  
80 pieces (length ~10 cm) and then placed on a combustion stove. After dropping 1 mL of  
81 alcohol on the biomass fuels they were ignited with an electronic gas lighter. The smoke  
82 particles were diluted and transported into the mixing chamber. Finally, smoke particles were  
83 collected on quartz fiber filters (Ø 90 mm: Whatman, Maidstone, UK) in a PM<sub>2.5</sub> sampler at a  
84 flow rate of 80 L/min. Five complete experiments were conducted for each biomass fuel and  
85 five smoke PM<sub>2.5</sub> filter samples were obtained.

86 (2) Coal combustion smoke samples. The smoke particles emitted from the CC  
87 samples were also collected in the same combustion and sampling system. Sample collection

88 was conducted according to the method introduced by Li et al. (2018). Briefly, two anthracite  
89 briquettes were ignited in a burning coal honeycomb briquette stove and were then moved  
90 into the other coal stove. After the burning stage of coal was reached and smoke emissions  
91 were minimized, the coal stove was placed into the sampling system. Then, one honeycomb  
92 sample was placed in the pre-burned coal stove. The resulting smoke was diluted and passed  
93 into the mixing chamber. Finally, smoke samples were collected with the PM<sub>2.5</sub> sampler at a  
94 flow rate of 80 L/min. To obtain sufficient smoke sample for the comprehensive  
95 characterization of the BrC fractions, each coal was burned at least for three cycles. All  
96 quartz filters were baked for 6 h at 450 °C to remove any organics absorbed on the filters and  
97 then wrapped with baked aluminum foil. After sampling, the filter samples were re-wrapped  
98 with baked aluminum foil and stored in a refrigerator (−20 °C) prior to analysis.

99 Field blank quartz filters were collected before each group of combustion experiments  
100 under conditions in which the fuels were not ignited. The field blank filters were used to  
101 correct the mass of smoke PM<sub>2.5</sub> and water-/methanol- soluble BrC, as well as the optical  
102 signals and DTT consumption by BrC. To prevent contamination of the following sample, the  
103 collection system was cleaned before each new combustion experiment.

104

### 105 **S3. Extraction and fractionation of BrC**

106 The BrC fractions (i.e., water-soluble organic compounds [WSOC], humic-like  
107 substances [HULIS], and methanol-soluble organic compounds [MSOC]) were obtained with  
108 solvent extraction and a solid-phase extraction (SPE) method, as indicated in our previous  
109 studies (Fan et al., 2018; Fan et al., 2016; Li et al., 2018). The filter samples were

110 ultrasonically extracted three times with 20 mL ultrapure water for 30 min. The extracts were  
111 filtered through a 0.22  $\mu\text{m}$  polytetrafluoroethylene (PTFE) syringe filter to obtain the WSOC  
112 fraction. The HULIS fraction in WSOC was isolated with an SPE method (Chen and Bond,  
113 2010; Zhang et al., 2013; Cheng et al., 2016; Cheng et al., 2017). Briefly, the pH of the  
114 WSOC solution was acidified to 2 with HCl, and the solution introduced into a  
115 pre-conditioned SPE cartridge (Oasis HLB, 200 mg, Waters, Milford, MA, USA). The most  
116 hydrophilic species was removed by the cartridge, whereas the relatively hydrophobic HULIS  
117 fraction was retained. Then the SPE column was rinsed with pure water to remove inorganics  
118 and the retained organics were eluted with methanol. Finally, the HULIS solution was  
119 evaporated to dryness under a gentle nitrogen stream.

120 The MSOC was obtained by a method developed by Cheng et al. (2016). Briefly, the  
121 filter samples were immersed in 20 mL methanol (Macklin, >99.9%, Shanghai, China) for 2 h  
122 and then filtered through a 0.22  $\mu\text{m}$  PTFE syringe filter (Jinteng, Tianjin, China). Static  
123 digestion without ultrasonic treatment can avoid the loss of particulate matter and facilitate  
124 the determination of dissolved organic matter content. Finally, the dried residual filters and  
125 untreated filters were analyzed to determine their carbon contents.

126

#### 127 **S4. Organic carbon/elemental carbon (OC/EC) and total organic carbon (TOC) analysis**

128 The OC and EC in smoke filter samples were measured using an OC/EC analyzer (TOT,  
129 Sunset Laboratory Inc., Portland, OR, USA). The analysis was conducted according to the  
130 National Institute of Occupational Safety and Health (NIOSH) 870 method (Chow et al.,  
131 2001; Wu et al., 2016). The TOC content of WSOC and HULIS was determined by a

132 high-temperature catalytic oxidation instrument (VCPH analyzer, Shimadzu, Kyoto, Japan)  
133 following the non-purgeable OC protocol. The detailed measurement method is provided in  
134 the SI file. The content of the MSOC fraction was indirectly obtained by subtracting the TC  
135 concentrations of the extracted filters from that of the untreated filters. The experiments were  
136 all repeated three times and the concentrations reported here were corrected for their  
137 respective blank concentrations.

138

### 139 **S5. UV-visible properties**

140 The UV-visible absorption spectra of the BrC fractions (i.e., WSOC, HULIS, and MSOC)  
141 were recorded between the wavelengths of 200 to 700 nm using a UV-2600 UV-vis  
142 spectrophotometer (Shimadzu). The sample solution was placed in a 1-cm quartz cuvette and  
143 analyzed at 1 nm intervals. Ultrapure water was used as a blank reference for the WSOC and  
144 HULIS solutions, while pure methanol was used for the MSOC fraction. The field blank sample  
145 solution was also used as the blank sample, and the interference from the instrument and  
146 operating blank was determined.

147 The absorption Ångström exponent (AAE) is a measure of the spectral dependence of  
148 the light absorption of BrC solutions (Cheng et al., 2016), which was calculated by the  
149 following equation:

$$150 \quad A_{\lambda} = K\lambda^{-\text{AAE}} \quad (2)$$

151 where  $A_{\lambda}$  is the absorbance derived from the spectrophotometer at a given wavelength  $\lambda$  (330–  
152 400 nm) and  $K$  is a constant.

153 The mass absorption efficiency at 365 nm ( $\text{MAE}_{365}$ ) is an important parameter used to

154 characterize the light absorbing ability of BrC. It was obtained using the following equation:

155 
$$\text{MAE}_\lambda = \frac{A_\lambda}{c \cdot L} \times \ln(10) \quad (3)$$

156 where  $A_\lambda$  is the absorbance at  $\lambda$  nm,  $c$  is the carbon concentration of BrC in solution ( $\mu\text{gC}$   
157  $\text{mL}^{-1}$ ), and  $L$  is the absorbing path length.

158

159

160

161

162

163



164 **Table S1.** Region, excitation/emission wavelength maxima range and attribution of chromophores in BrC  
 165 emitted from BB and CC

| Region | $\lambda_{ex}$ max(nm) | $\lambda_{em}$ max(nm) | Fluorescent compounds               | References                                   |
|--------|------------------------|------------------------|-------------------------------------|----------------------------------------------|
| I      | 220-250                | 290-320                | protein-like amino acid             | (Cui et al., 2016; Coble, 1996)              |
| II     | 220-250                | 320-380                | protein-like UV region              | (Mostofa et al., 2011; Mounier et al., 2010) |
| III    | 220-250                | 380-460                | fulvic-like                         | (Chen et al., 2003; Santos et al., 2012)     |
| IV     | 250-380                | 280-380                | tryptophan-like/microbial byproduct | (Santos et al., 2012; Cui et al., 2016)      |
| V      | 250-380                | 380-460                | humic-like organic                  | (Chen et al., 2003; Qin et al., 2018)        |

166  
 167  
 168  
 169

170 **Table S2.** Results of DTT assay conducted on the WSOC, HULIS and MSOC of smoke samples

|                    | Samples | Calculated by PM mass(pmol/min/ $\mu$ g) |               |               |
|--------------------|---------|------------------------------------------|---------------|---------------|
|                    |         | WSOC                                     | HULIS         | MSOC          |
| Biomass<br>burning | WS      | 4.5 $\pm$ 3.8                            | 3.2 $\pm$ 2.8 | 85 $\pm$ 12   |
|                    | RS      | 6.1 $\pm$ 0.5                            | 5.5 $\pm$ 0.6 | 84 $\pm$ 5.6  |
|                    | CS      | 7.4 $\pm$ 1.4                            | 3.0 $\pm$ 0.7 | 69 $\pm$ 11   |
|                    | PW      | 5.9 $\pm$ 3.3                            | 3.1 $\pm$ 0.3 | 9.1 $\pm$ 1.5 |
|                    | CF      | 5.5 $\pm$ 2.3                            | 3.2 $\pm$ 0.9 | 14 $\pm$ 6.9  |
|                    | WP      | 5.6 $\pm$ 2.8                            | 2.6 $\pm$ 1.0 | 11 $\pm$ 7.6  |
| Coal<br>combustion | B-1     | 1.6 $\pm$ 0.2                            | 1.1 $\pm$ 0.1 | 7.7 $\pm$ 0.8 |
|                    | B-2     | 2.1 $\pm$ 0.2                            | 1.5 $\pm$ 0.1 | 11 $\pm$ 3.2  |
|                    | B-3     | 0.5 $\pm$ 0.1                            | 0.5 $\pm$ 0.1 | 3.2 $\pm$ 1.7 |
|                    | B-4     | 1.9 $\pm$ 0.5                            | 0.9 $\pm$ 0.2 | 3.1 $\pm$ 1.0 |
|                    | AN      | 0.7 $\pm$ 0.2                            | 0.4 $\pm$ 0.1 | 6.7 $\pm$ 2.9 |

171 <sup>a</sup> error bars represent standard deviation based on quadruplicate test

172  
 173  
 174  
 175  
 176

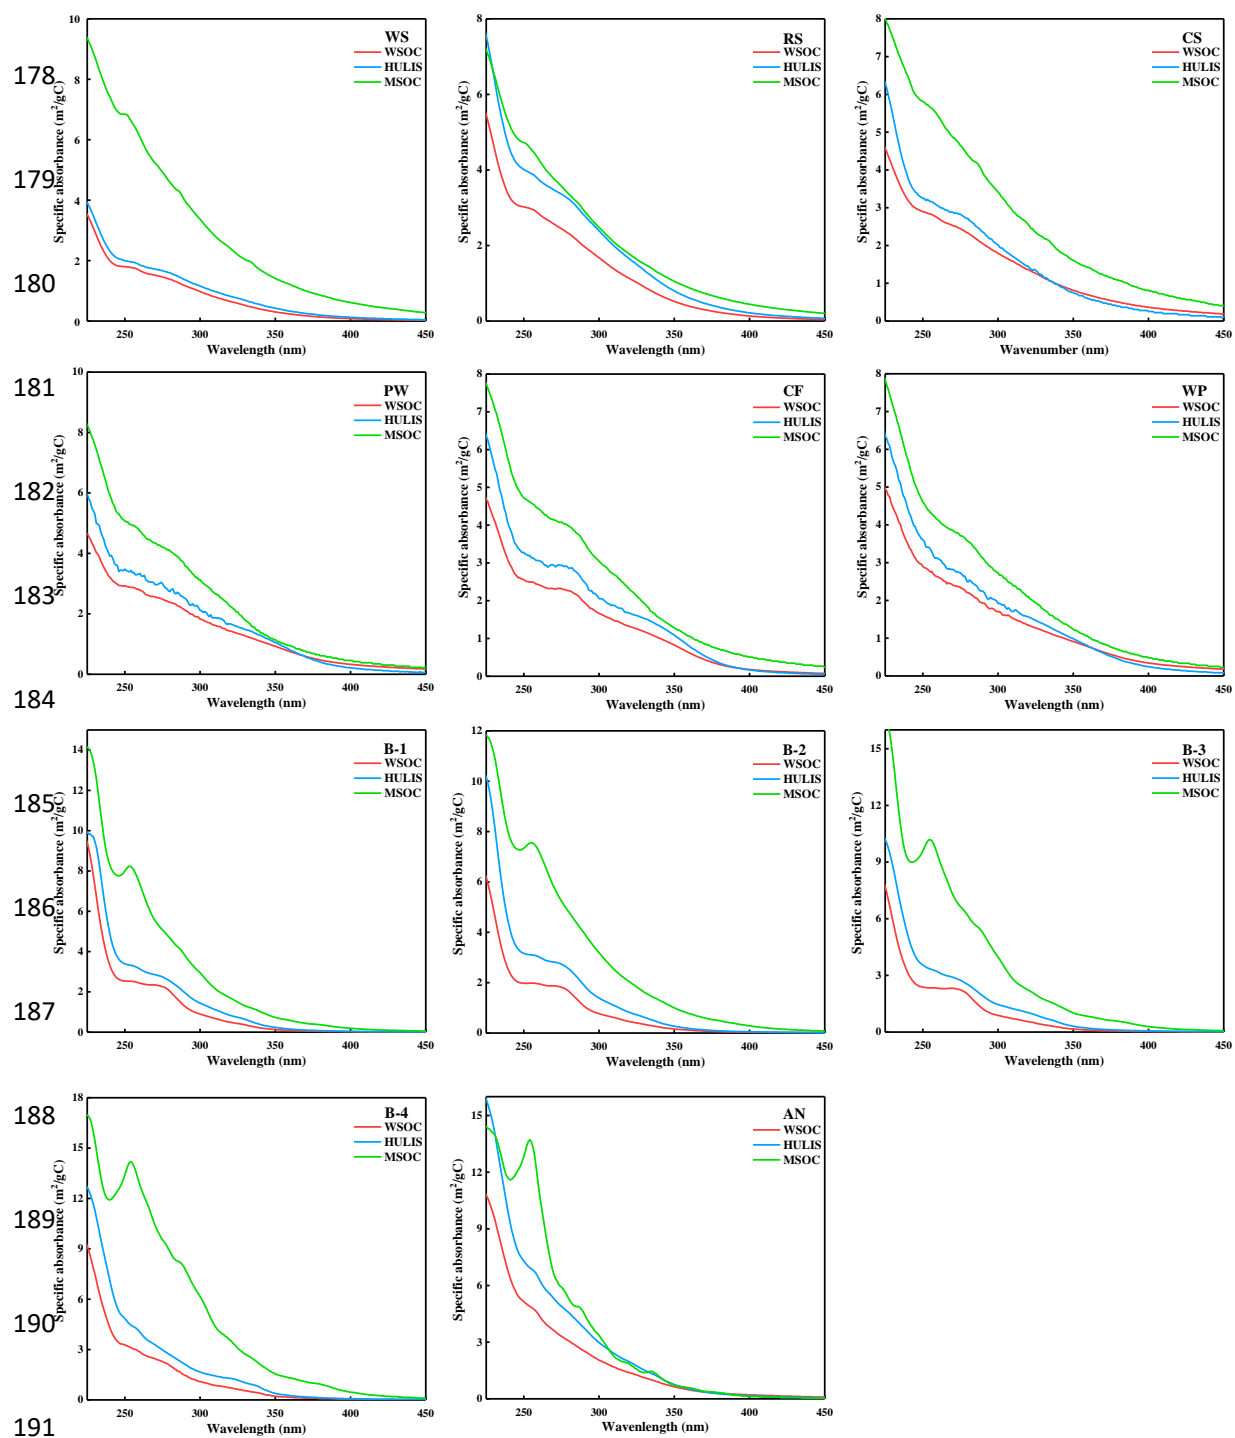

192 **Figure S1.** The normalized UV-vis spectra by organic carbon contents of WSOC, HULIS,  
 193 and MSOC fractions

194

195

196

197

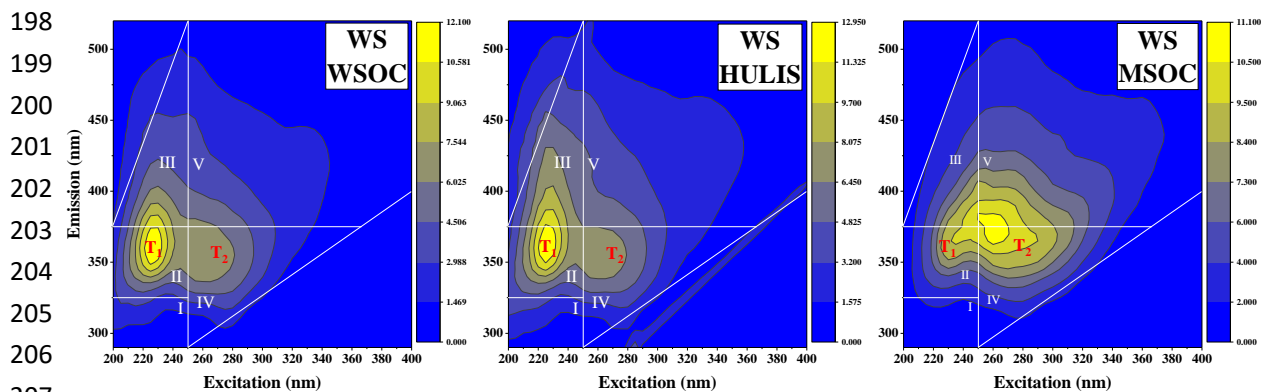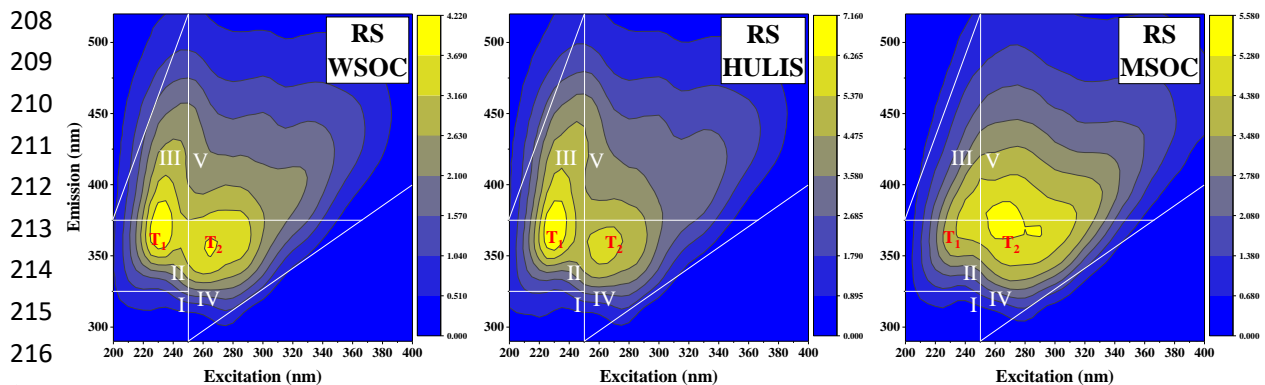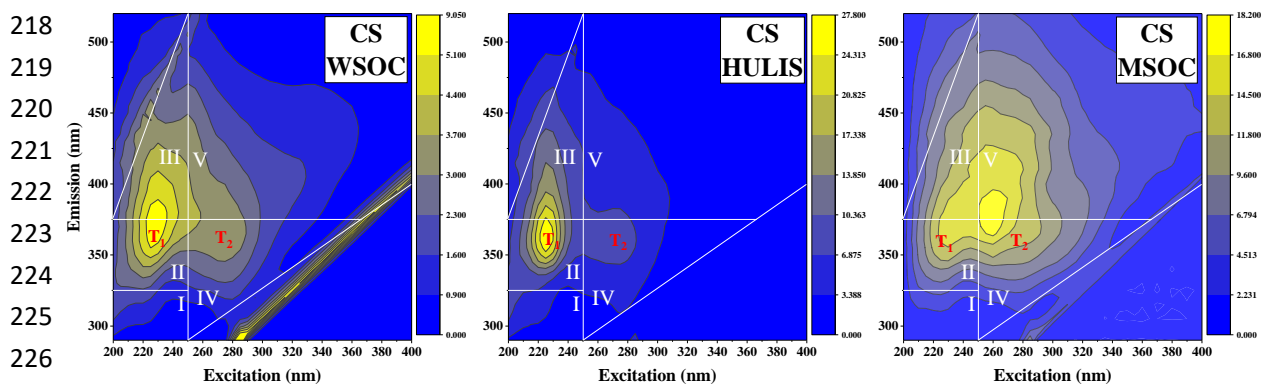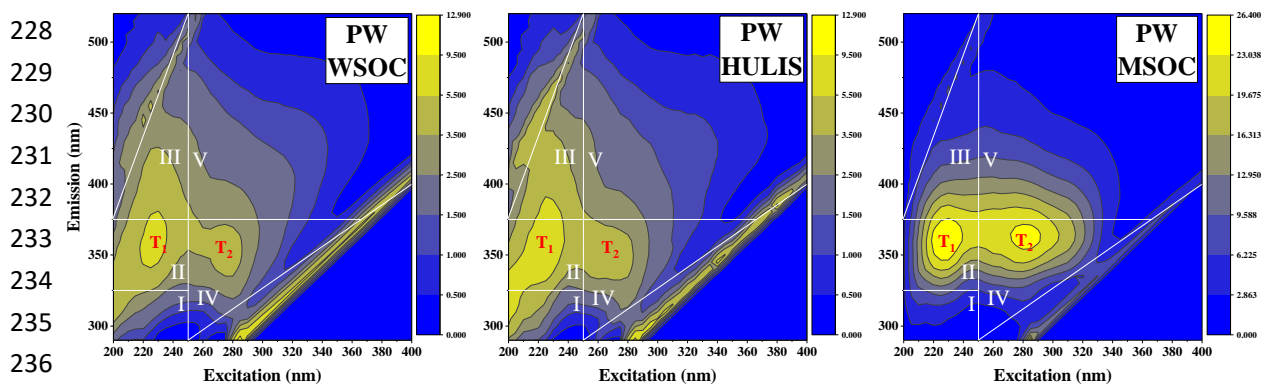

237  
238  
239  
240  
241

242  
 243  
 244  
 245  
 246  
 247  
 248  
 249  
 250  
 251  
 252  
 253  
 254  
 255  
 256  
 257  
 258  
 259  
 260  
 261  
 262  
 263  
 264  
 265  
 266  
 267  
 268  
 269  
 270  
 271  
 272  
 273  
 274  
 275  
 276  
 277  
 278  
 279  
 280  
 281  
 282  
 283  
 284  
 285

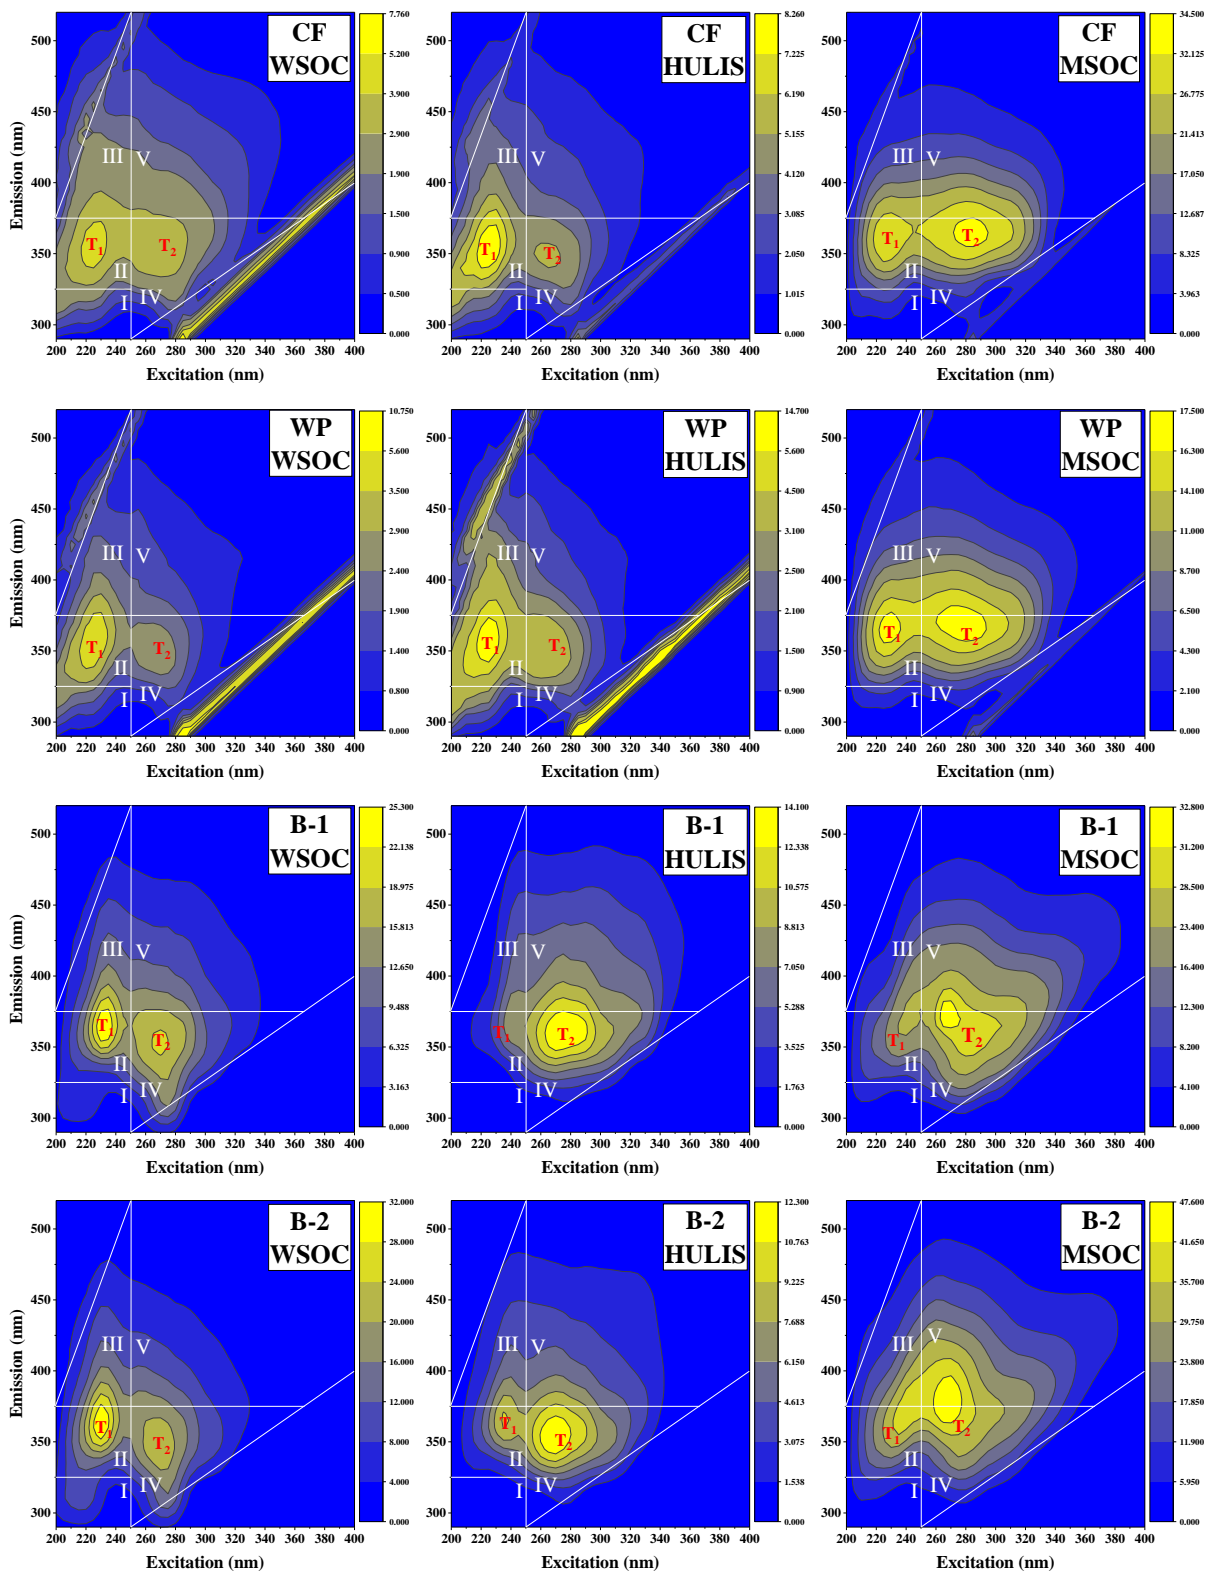

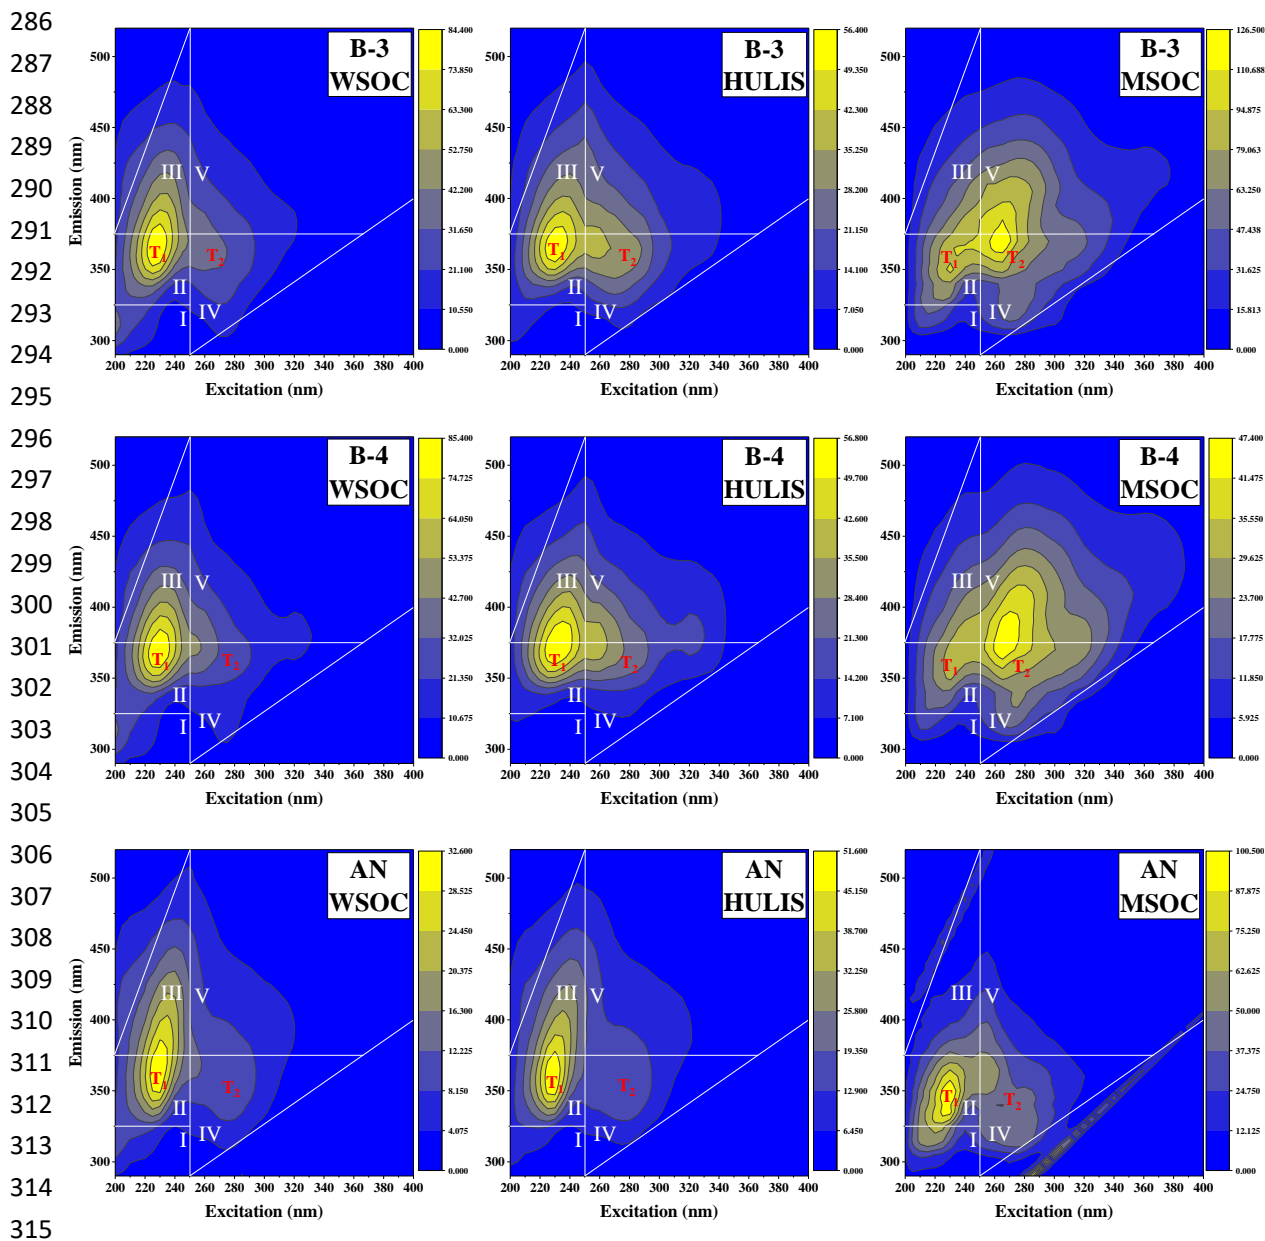

316 **Figure S2.** EEM fluorescence counter maps of corresponding WSOC, HULIS, MSOC of BB  
 317 and CC smoke samples, presented as specific intensity (a.u. L(mg C<sup>-1</sup>))

318

319

320

321

322

323

324

325

326

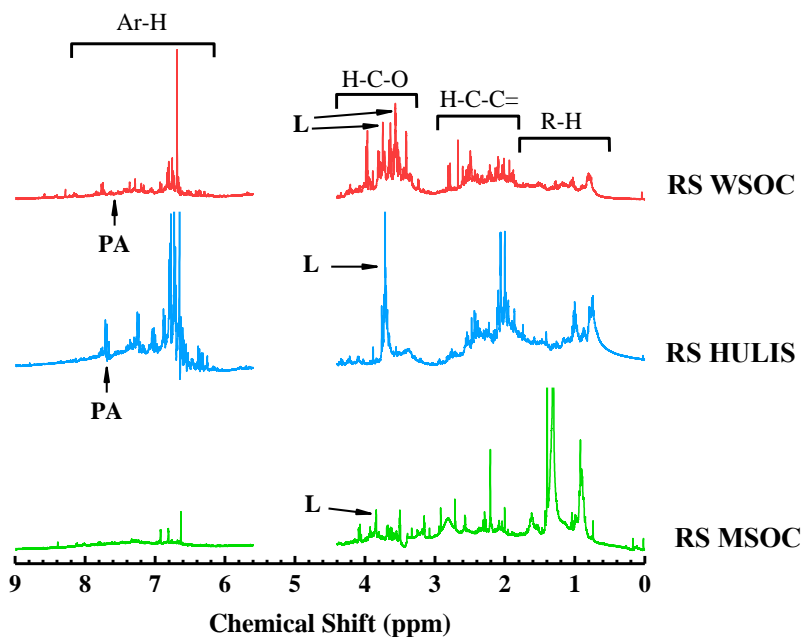

327

328

329

330

331

332

333

334

335

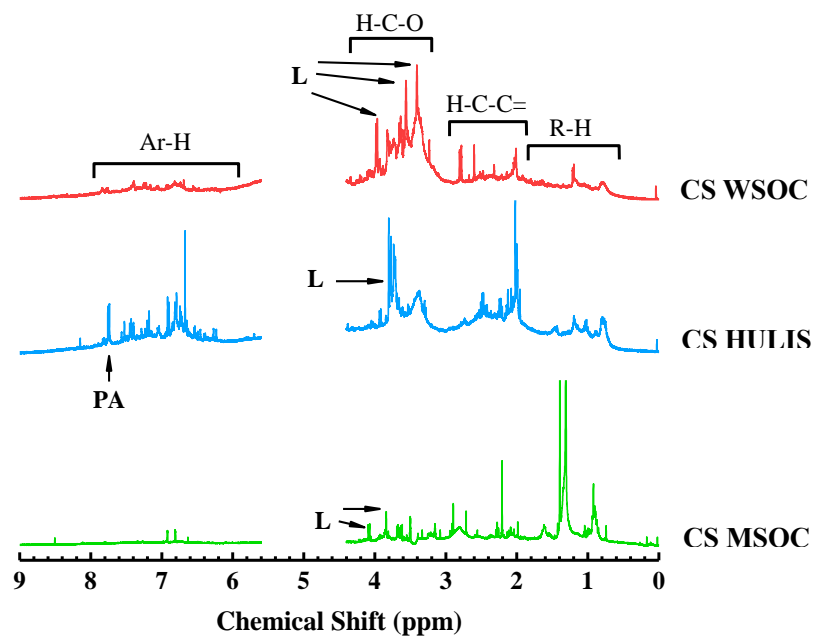

336

337

338

339

340

341

342

343

344

345

346

347

348

349

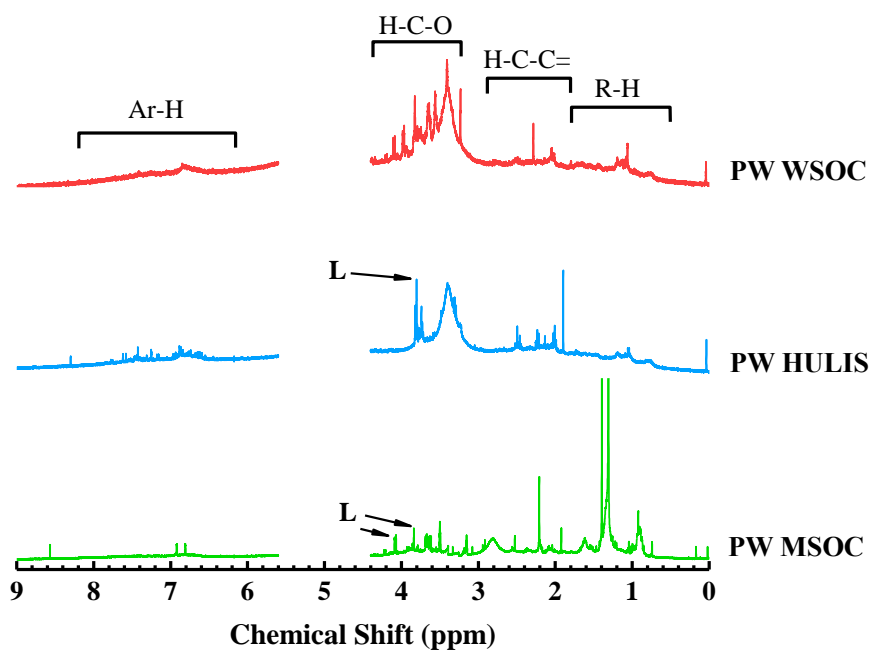

350

351

352

353

354

355

356

357

358

359

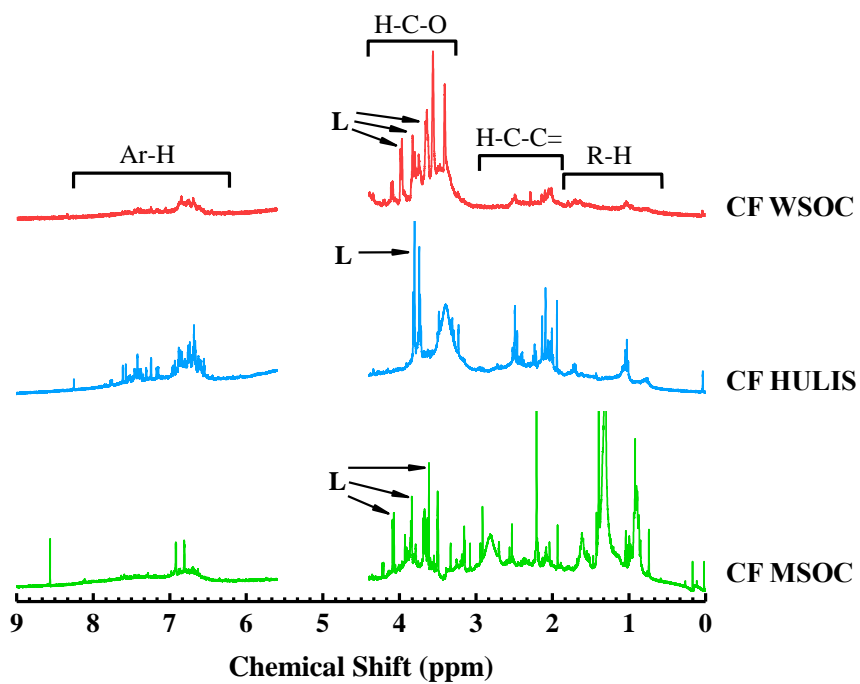

360

361

362

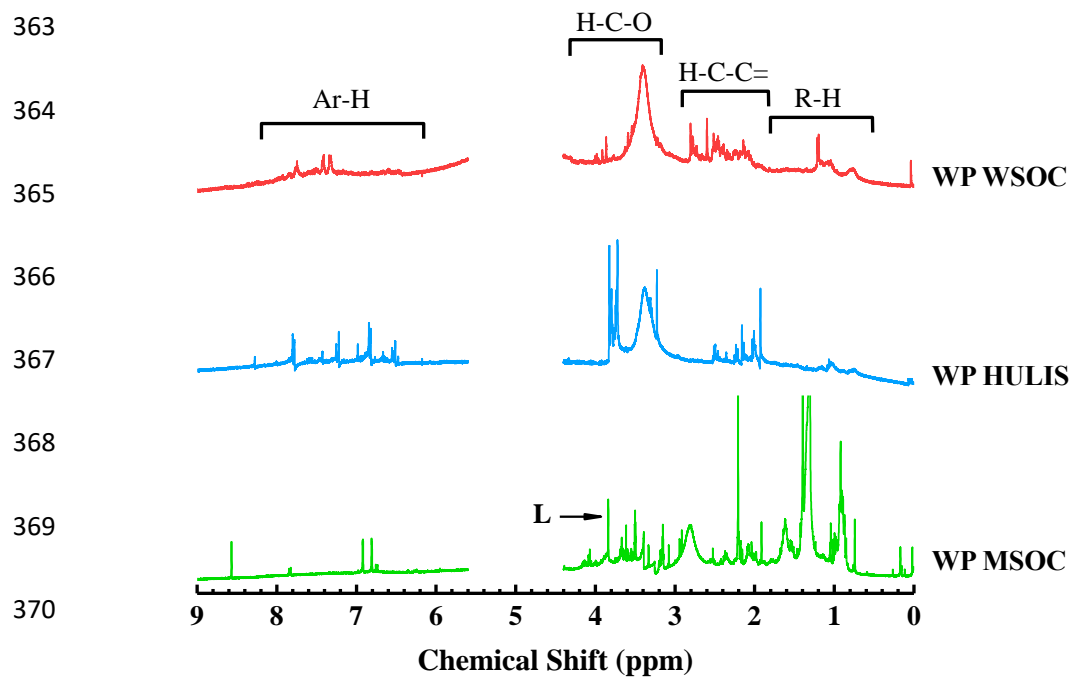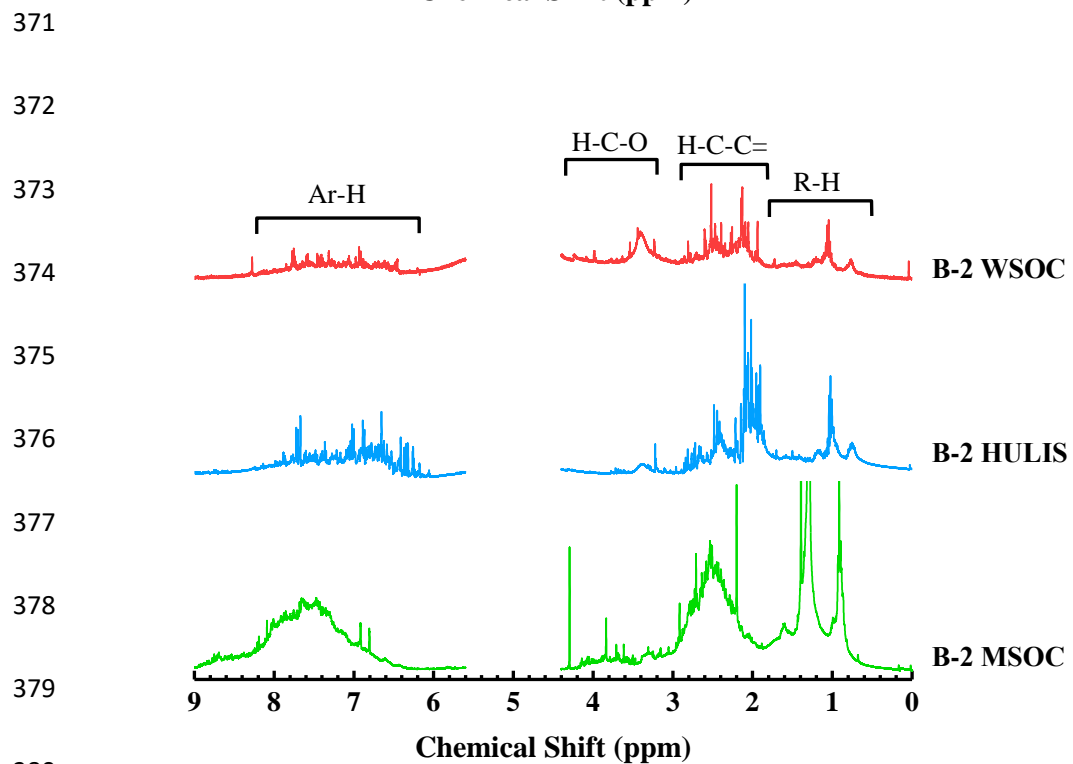

380

381

382

383

384



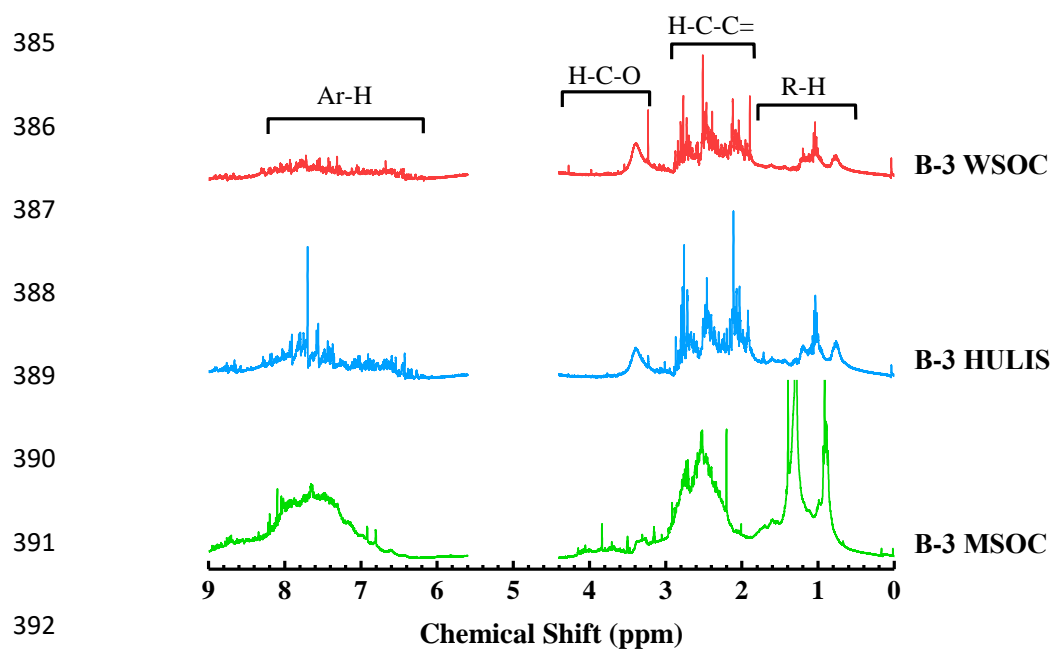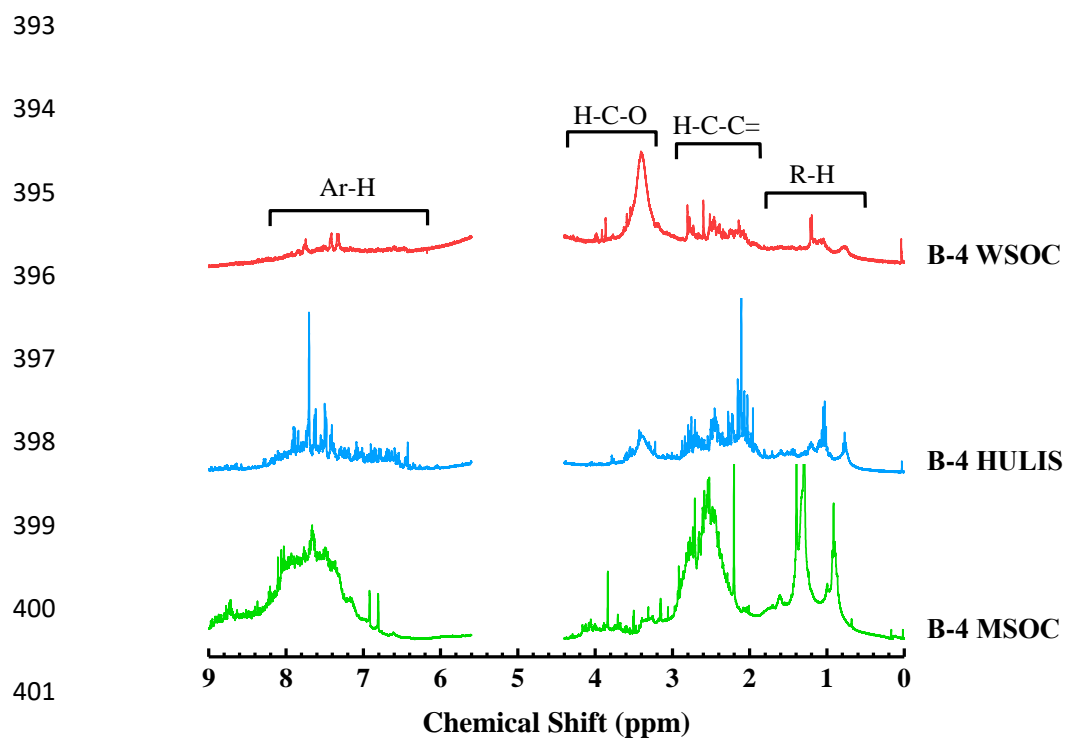

403  
404  
405  
406

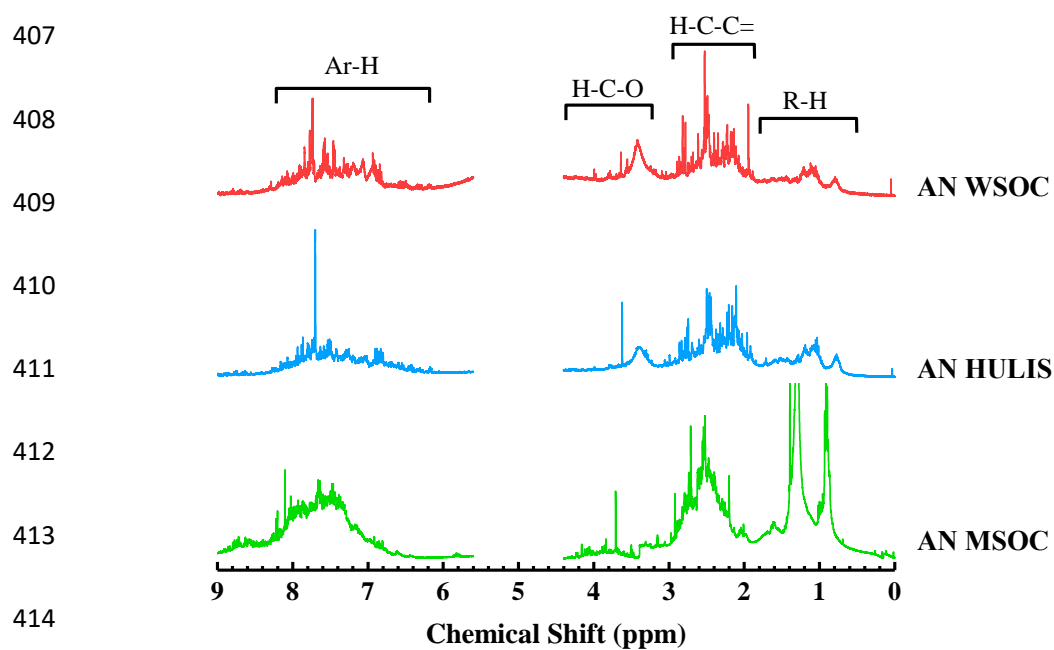

416 **Figure S3.**  $^1\text{H-NMR}$  stacking diagram of corresponding WSOC, HULIS, MSOC of BB and  
 417 CC smoke samples. The segment from 4.40 to 5.60 ppm was removed for NMR spectra due  
 418 to MeOH and  $\text{H}_2\text{O}$  residues. The peaks were assigned to specific compounds as follows:  
 419 Levoglucosan (L), Phthalic acid (PA).

420

421 **References**

422 Chen, W., Westerhoff, P., Leenheer, J. A., and Booksh, K.: Fluorescence excitation - Emission  
423 matrix regional integration to quantify spectra for dissolved organic matter,  
424 *Environmental science & technology*, 37, 5701-5710, 10.1021/es034354c, 2003.

425 Chen, Y., and Bond, T. C.: Light absorption by organic carbon from wood combustion,  
426 *Atmospheric Chemistry and Physics*, 10, 1773-1787, DOI 10.5194/acp-10-1773-2010,  
427 2010.

428 Cheng, Y., He, K. B., Du, Z. Y., Engling, G., Liu, J. M., Ma, Y. L., Zheng, M., and Weber, R.  
429 J.: The characteristics of brown carbon aerosol during winter in Beijing, *Atmospheric*  
430 *Environment*, 127, 355-364, 10.1016/j.atmosenv.2015.12.035, 2016.

431 Cheng, Y., He, K. B., Engling, G., Weber, R., Liu, J. M., Du, Z. Y., and Dong, S. P.: Brown  
432 and black carbon in Beijing aerosol: Implications for the effects of brown coating on  
433 light absorption by black carbon, *The Science of the total environment*, 599-600,  
434 1047-1055, 10.1016/j.scitotenv.2017.05.061, 2017.

435 Chow, J. C., Watson, J. G., Crow, D., Lowenthal, D. H., and Merrifield, T.: Comparison of  
436 IMPROVE and NIOSH carbon measurements, *Aerosol Science and Technology*, 34,  
437 23-34, 10.1080/027868201300081923, 2001.

438 Coble, P. G.: Characterization of marine and terrestrial DOM in seawater using excitation  
439 emission matrix spectroscopy, *Marine Chemistry*, 51, 325-346,  
440 10.1016/0304-4203(95)00062-3, 1996.

441 Cui, X., Zhou, D., Fan, W., Huo, M., Crittenden, J. C., Yu, Z., Ju, P., and Wang, Y.: The  
442 effectiveness of coagulation for water reclamation from a wastewater treatment plant

443 that has a long hydraulic and sludge retention times: A case study, *Chemosphere*, 157,  
444 224-231, 10.1016/j.chemosphere.2016.05.009, 2016.

445 Fan, X., Li, M., Cao, T., Cheng, C., Li, F., Xie, Y., Wei, S., Song, J., and Peng, P. a.: Optical  
446 properties and oxidative potential of water-and alkaline-soluble brown carbon in smoke  
447 particles emitted from laboratory simulated biomass burning, *Atmospheric Environment*,  
448 194, 48-57, 10.1016/j.atmosenv.2018.09.025, 2018.

449 Fan, X. J., Wei, S. Y., Zhu, M. B., Song, J. Z., and Peng, P. A.: Comprehensive  
450 characterization of humic-like substances in smoke PM<sub>2.5</sub> emitted from the combustion  
451 of biomass materials and fossil fuels, *Atmospheric Chemistry and Physics*, 16,  
452 13321-13340, 10.5194/acp-16-13321-2016, 2016.

453 Ke, H., Gong, S., He, J., Zhou, C., Zhang, L., and Zhou, Y.: Spatial and temporal distribution  
454 of open bio-mass burning in China from 2013 to 2017, *Atmospheric Environment*, 210,  
455 156-165, 10.1016/j.atmosenv.2019.04.039, 2019.

456 Li, M., Fan, X., Zhu, M., Zou, C., Song, J., Wei, S., Jia, W., and Peng, P.: Abundances and  
457 light absorption properties of brown carbon emitted from residential coal combustion in  
458 China, *Environmental science & technology*, 10.1021/acs.est.8b05630, 2018.

459 Mostofa, K. M. G., Wu, F. C., Liu, C. Q., Vione, D., Yoshioka, T., Sakugawa, H., and Tanoue,  
460 E.: Photochemical, microbial and metal complexation behavior of fluorescent dissolved  
461 organic matter in the aquatic environments, *Geochem. J.*, 45, 235-254, 2011.

462 Mounier, S., Zhao, H., Garnier, C., and Redon, R.: Copper complexing properties of  
463 dissolved organic matter: PARAFAC treatment of fluorescence quenching,  
464 *Biogeochemistry*, 106, 107-116, 10.1007/s10533-010-9486-6, 2010.

465 Qin, J., Zhang, L., Zhou, X., Duan, J., Mu, S., Xiao, K., Hu, J., and Tan, J.: Fluorescence  
466 fingerprinting properties for exploring water-soluble organic compounds in PM 2.5 in an  
467 industrial city of northwest China, *Atmospheric Environment*, 184, 203-211,  
468 10.1016/j.atmosenv.2018.04.049, 2018.

469 Santos, P. S., Santos, E. B., and Duarte, A. C.: First spectroscopic study on the structural  
470 features of dissolved organic matter isolated from rainwater in different seasons, *The*  
471 *Science of the total environment*, 426, 172-179, 10.1016/j.scitotenv.2012.03.023, 2012.

472 Shen, G., Chen, Y., Wei, S., Fu, X., Zhu, Y., and Tao, S.: Mass absorption efficiency of  
473 elemental carbon for source samples from residential biomass and coal combustions,  
474 *Atmospheric Environment*, 79, 79-84, 10.1016/j.atmosenv.2013.05.082, 2013.

475 Wu, C., Huang, X. H. H., Ng, W. M., Griffith, S. M., and Yu, J. Z.: Inter-comparison of  
476 NIOSH and IMPROVE protocols for OC and EC determination:  
477 implications for inter-protocol data conversion, *Atmospheric Measurement Techniques*, 9,  
478 4547-4560, 10.5194/amt-9-4547-2016, 2016.

479 Zhang, X., Lin, Y. H., Surratt, J. D., and Weber, R. J.: Sources, composition and absorption  
480 Angstrom exponent of light-absorbing organic components in aerosol extracts from the  
481 Los Angeles Basin, *Environmental science & technology*, 47, 3685-3693,  
482 10.1021/es305047b, 2013.

483

484
